# Supplementary material
Source: MDPI journal article supplement (https://www.mdpi.com/2073-4433/12/7/915)
Supplement: s1 [file s1]

# Chemical Composition of Gas and Particle Phase Products of Toluene Photooxidation Reaction under High OH Exposure Condition

Yik-Sze Lau <sup>1</sup>, Man-Nin Chan <sup>2</sup>, Hon-Yin Poon <sup>1,2</sup>, Yan Tan <sup>3</sup>, Shun-Cheng Lee <sup>3</sup>, Jianjun Li <sup>4</sup> and Kin-Fai Ho <sup>1,2,\*</sup>

<sup>1</sup> JC School of Public Health and Primary Care, The Chinese University of Hong Kong, Hong Kong, China; yiksze.lau@hdr.qut.edu.au (Y.-S.L.); 1155064047@link.cuhk.edu.hk (H.-Y.P.)

<sup>2</sup> Earth System Science Programme, The Chinese University of Hong Kong, Hong Kong, China; mnchan@cuhk.edu.hk (M.-N.C)

<sup>3</sup> Department of Civil and Structural Engineering, The Hong Kong Polytechnic University, Hong Kong, China; yan.tan@connect.polyu.hk (Y.T.); shun-cheng.lee@polyu.edu.hk (S.-C.L.)

<sup>4</sup> State Key Laboratory of Loess and Quaternary Geology, Institute of Earth Environment, Chinese Academy of Sciences, Xi'an 710061, China; lij@ieecas.cn

\* Correspondence: kfhho@cuhk.edu.hk

**Citation:** Lau, Y.-S.; Chan, M.-N.; Poon, H.-Y.; Tan, Y.; Lee, S.-C.; Li, J.; Ho, K.-F. Chemical Composition of Gas and Particle Phase Products of Toluene Photooxidation Reaction under High OH Exposure Condition. *Atmosphere* **2021**, *12*, 915. <https://doi.org/10.3390/atmos12070915>

Academic Editor: Daniele Contini

Received: 2 June 2021

Accepted: 9 July 2021

Published: 14 July 2021

**Publisher's Note:** MDPI stays neutral with regard to jurisdictional claims in published maps and institutional affiliations.

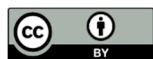

**Copyright:** © 2021 by the authors. Licensee MDPI, Basel, Switzerland. This article is an open access article distributed under the terms and conditions of the Creative Commons Attribution (CC BY) license (<http://creativecommons.org/licenses/by/4.0/>).

**Table S1.** Experiment list for gas phase product study.

| VOC     | RH (%) | OH exposure<br>(1 × 10 <sup>12</sup> molec cm <sup>-3</sup> s) | Seed particle                                   |
|---------|--------|----------------------------------------------------------------|-------------------------------------------------|
| Toluene | 17     | 0.40                                                           | -                                               |
|         |        | 0.55                                                           | -                                               |
|         |        | 0.65                                                           | -                                               |
|         |        | 0.75                                                           | -                                               |
|         | 36     | 0.56                                                           | -                                               |
|         |        | 0.82                                                           | -                                               |
|         |        | 0.95                                                           | -                                               |
|         |        | 1.05                                                           | -                                               |
|         | 60     | 0.76                                                           | -                                               |
|         |        | 1.07                                                           | -                                               |
|         |        | 1.30                                                           | -                                               |
|         |        | 1.44                                                           | -                                               |
|         | 34     | 0.45                                                           | (NH <sub>4</sub> ) <sub>2</sub> SO <sub>4</sub> |
|         |        | 0.78                                                           | (NH <sub>4</sub> ) <sub>2</sub> SO <sub>4</sub> |
|         |        | 0.89                                                           | (NH <sub>4</sub> ) <sub>2</sub> SO <sub>4</sub> |
|         |        | 1.03                                                           | (NH <sub>4</sub> ) <sub>2</sub> SO <sub>4</sub> |
|         | 62     | 0.54                                                           | (NH <sub>4</sub> ) <sub>2</sub> SO <sub>4</sub> |
|         |        | 0.75                                                           | (NH <sub>4</sub> ) <sub>2</sub> SO <sub>4</sub> |
|         |        | 0.93                                                           | (NH <sub>4</sub> ) <sub>2</sub> SO <sub>4</sub> |
|         |        | 1.03                                                           | (NH <sub>4</sub> ) <sub>2</sub> SO <sub>4</sub> |

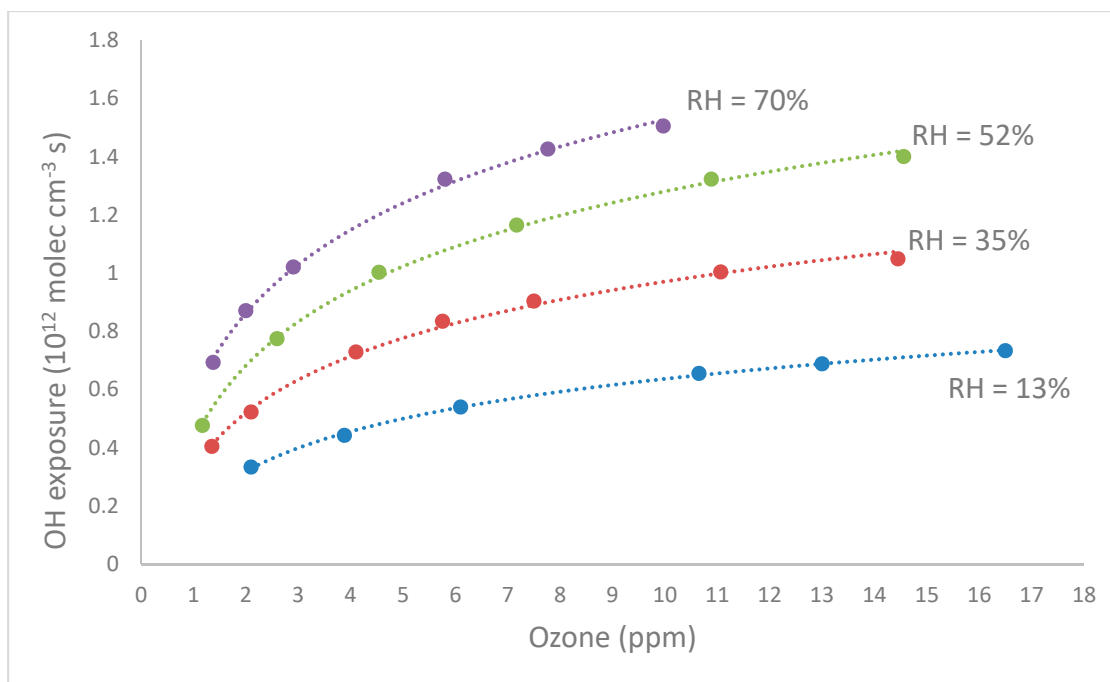

**Figure S1.** Calibration curve of OH exposure under different RH

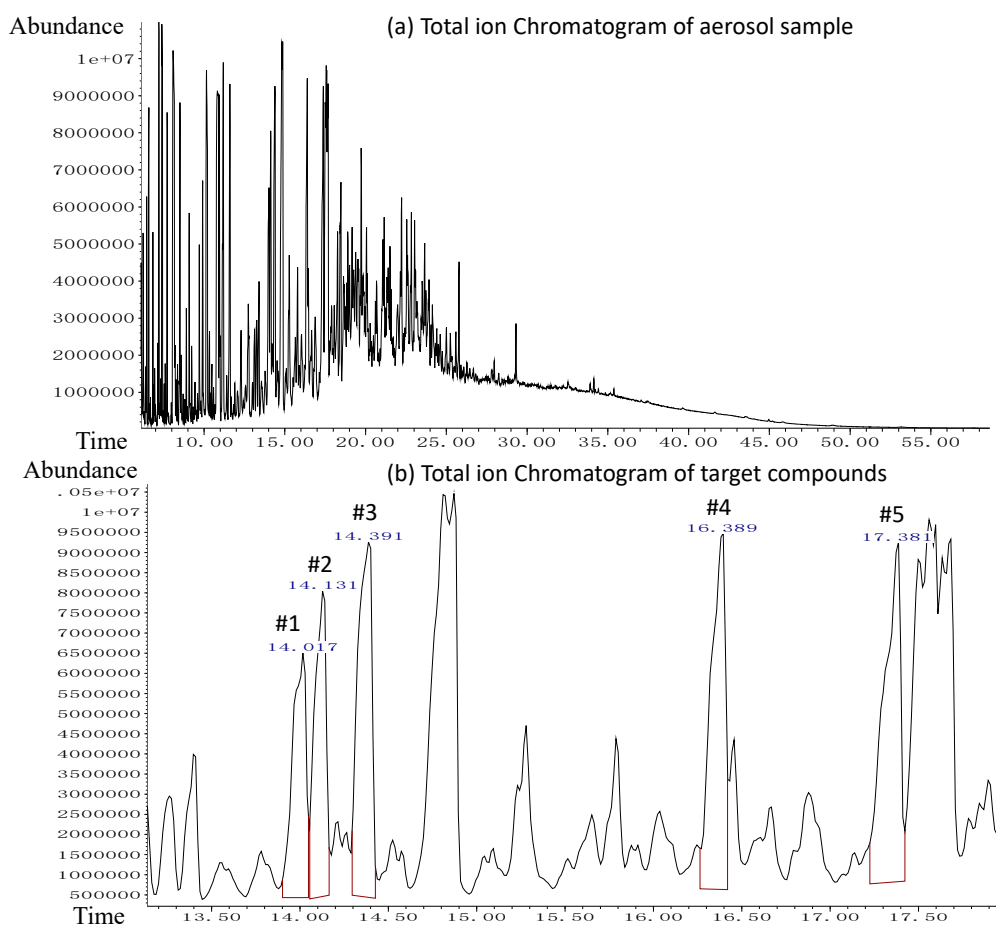

**Figure S2.** Total ion chromatogram of aerosol samples and target compounds. Target Compounds: #1, Citramalic acid; #2, 2,3-Dihydroxy-4-oxopentanoic acid; #3, Malic acid; #4, Tartaric acid; #5, 2,3-dihydroxy-glutaric acid.

**Table S2.** Dot products between spectrums obtained in each experiment. The unit of OH exposure is  $1 \times 10^{12}$  molec  $\text{cm}^{-3}$  s. Areas in grey represent dot products between experiments of different RH, and areas in light brown represent dot products between experiments with and without using seed particles.

| RH            |        | 17%  |      |      |      | 36%  |      |      |      | 60%  |      |      |      | 34% (seed) |      |      |      | 62% (seed) |      |      |      |
|---------------|--------|------|------|------|------|------|------|------|------|------|------|------|------|------------|------|------|------|------------|------|------|------|
|               | OH exp | 0.4  | 0.55 | 0.65 | 0.75 | 0.56 | 0.82 | 0.95 | 1.05 | 0.76 | 1.07 | 1.3  | 1.44 | 0.45       | 0.78 | 0.89 | 1.03 | 0.54       | 0.75 | 0.93 | 1.03 |
| 17%           | 0.4    | 1.00 | 0.97 | 0.93 | 0.89 | 0.94 | 0.90 | 0.88 | 0.84 | 0.91 | 0.88 | 0.86 | 0.84 | 0.82       | 0.79 | 0.78 | 0.78 | 0.75       | 0.76 | 0.76 | 0.76 |
|               | 0.55   | -    | 1.00 | 0.99 | 0.97 | 0.98 | 0.96 | 0.95 | 0.94 | 0.95 | 0.95 | 0.94 | 0.93 | 0.82       | 0.81 | 0.82 | 0.83 | 0.77       | 0.80 | 0.80 | 0.81 |
|               | 0.65   | -    | -    | 1.00 | 0.99 | 0.98 | 0.98 | 0.98 | 0.97 | 0.95 | 0.96 | 0.96 | 0.96 | 0.76       | 0.77 | 0.79 | 0.81 | 0.73       | 0.77 | 0.77 | 0.79 |
|               | 0.75   | -    | -    | -    | 1.00 | 0.96 | 0.98 | 0.99 | 0.99 | 0.94 | 0.97 | 0.98 | 0.98 | 0.73       | 0.74 | 0.76 | 0.80 | 0.70       | 0.74 | 0.75 | 0.78 |
| 36%           | 0.56   |      |      |      |      | 1.00 | 0.98 | 0.97 | 0.95 | 0.99 | 0.98 | 0.97 | 0.95 | 0.76       | 0.75 | 0.76 | 0.78 | 0.72       | 0.74 | 0.75 | 0.76 |
|               | 0.82   |      |      |      |      | -    | 1.00 | 1.00 | 0.99 | 0.98 | 0.99 | 0.99 | 0.99 | 0.75       | 0.76 | 0.78 | 0.81 | 0.73       | 0.77 | 0.78 | 0.80 |
|               | 0.95   |      |      |      |      | -    | -    | 1.00 | 0.99 | 0.97 | 0.99 | 1.00 | 0.99 | 0.72       | 0.74 | 0.76 | 0.79 | 0.70       | 0.74 | 0.75 | 0.78 |
|               | 1.05   |      |      |      |      | -    | -    | -    | 1.00 | 0.95 | 0.98 | 0.99 | 1.00 | 0.70       | 0.73 | 0.75 | 0.79 | 0.70       | 0.74 | 0.75 | 0.78 |
| 60%           | 0.76   |      |      |      |      |      |      |      |      | 1.00 | 0.99 | 0.97 | 0.95 | 0.73       | 0.72 | 0.73 | 0.75 | 0.69       | 0.71 | 0.72 | 0.73 |
|               | 1.07   |      |      |      |      |      |      |      |      | -    | 1.00 | 0.99 | 0.98 | 0.73       | 0.74 | 0.75 | 0.78 | 0.71       | 0.74 | 0.75 | 0.77 |
|               | 1.3    |      |      |      |      |      |      |      |      | -    | -    | 1.00 | 0.99 | 0.71       | 0.72 | 0.74 | 0.78 | 0.69       | 0.73 | 0.75 | 0.77 |
|               | 1.44   |      |      |      |      |      |      |      |      | -    | -    | -    | 1.00 | 0.68       | 0.71 | 0.73 | 0.77 | 0.68       | 0.72 | 0.73 | 0.76 |
| 34%<br>(seed) | 0.45   |      |      |      |      |      |      |      |      |      |      |      |      | 1.00       | 0.99 | 0.98 | 0.97 | 0.98       | 0.97 | 0.97 | 0.95 |
|               | 0.78   |      |      |      |      |      |      |      |      |      |      |      |      | -          | 1.00 | 1.00 | 0.99 | 0.99       | 0.99 | 0.99 | 0.98 |
|               | 0.89   |      |      |      |      |      |      |      |      |      |      |      |      | -          | -    | 1.00 | 1.00 | 0.99       | 1.00 | 0.99 | 0.99 |
|               | 1.03   |      |      |      |      |      |      |      |      |      |      |      |      | -          | -    | -    | 1.00 | 0.98       | 0.99 | 0.99 | 0.99 |
| 62%<br>(seed) | 0.54   |      |      |      |      |      |      |      |      |      |      |      |      |            |      |      |      | 1.00       | 1.00 | 0.99 | 0.99 |
|               | 0.75   |      |      |      |      |      |      |      |      |      |      |      |      |            |      |      |      | -          | 1.00 | 1.00 | 0.99 |
|               | 0.93   |      |      |      |      |      |      |      |      |      |      |      |      |            |      |      |      | -          | -    | 1.00 | 1.00 |
|               | 1.03   |      |      |      |      |      |      |      |      |      |      |      |      |            |      |      |      | -          | -    | -    | 1.00 |
